# Supplementary material for: Basic Medium Heterogeneous Solution Synthesis of α-MnO2 Nanoflakes as an Anode or Cathode in Half Cell Configuration (vs. Lithium) of Li-Ion Batteries
Source: MDPI journal article supplement (doi:10.3390/nano8080608), 2018-08-09
Supplement: s1 [file s1]

## Supplementary materials

### *Basic Medium Heterogeneous Solution Synthesis of $\alpha$ - $MnO_2$ Nanoflakes as an Anode or Cathode in half Cell Configuration (vs Lithium) of Li-ion Batteries*

Kyungho Kim,<sup>a</sup> Geoffrey Daniel,<sup>b</sup> Vadim G. Kessler,<sup>c</sup> Gulaim A Seisenbaeva,<sup>\*c</sup> Vilas G. Pol<sup>\*d</sup>

<sup>a</sup> Materials Science and Engineering, Purdue University - West Lafayette, West Lafayette, IN, USA

<sup>b</sup> Department of Molecular Sciences, Swedish University of Agricultural Sciences, Box 7015, SE-75007 Uppsala, Sweden

<sup>c</sup> Department of Forest Products, Swedish University of Agricultural Sciences, Box , SE-75007 Uppsala, Sweden

<sup>d</sup> Davidson School of Chemical Engineering, Purdue University, West Lafayette, 47906, IN, USA

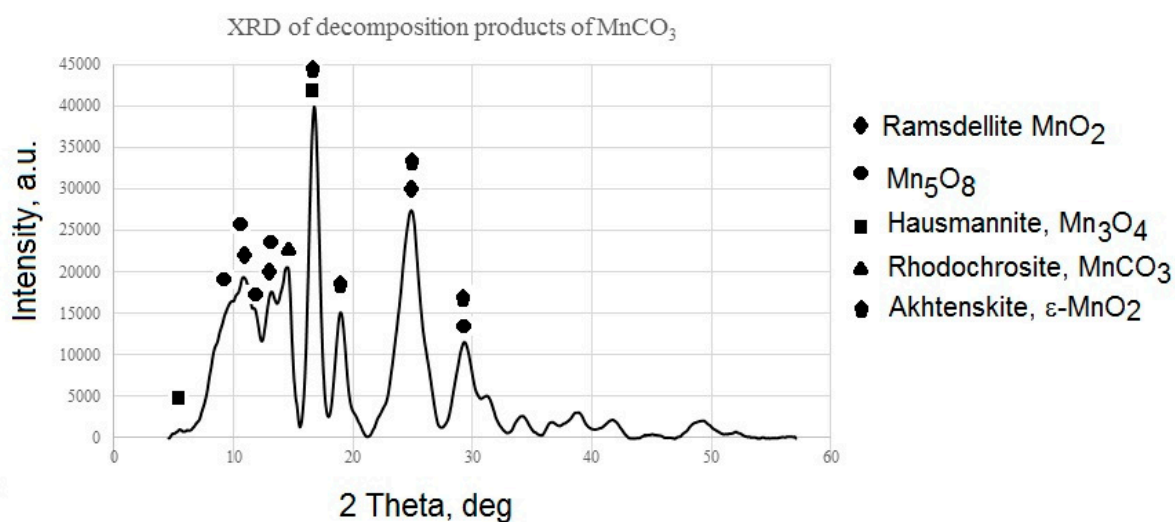

Figure S1. XRD pattern of decomposition products of  $MnCO_3$  with characteristic peaks for Ramsdellite  $MnO_2$  (ICPDS Card 82-2169),  $Mn_5O_8$  (39-1218), Hausmannite  $Mn_3O_4$  (80-382), Akhtenskite  $\epsilon$ - $MnO_2$  (30-0820) and Rhodochrosite  $MnCO_3$  (86-0173) marked in the image.

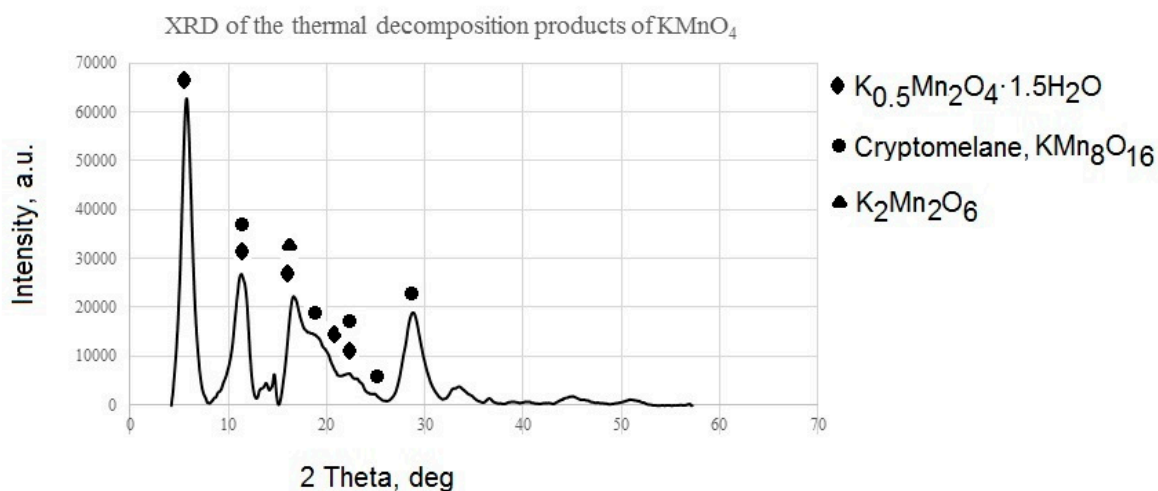

Figure S2. XRD of the material obtained by heat-treatment of the precipitate from the reaction  $\text{KMnO}_4$  with  $\text{NH}_3$  in aqueous medium at  $600^\circ\text{C}$  in 2h in air with characteristic peaks indicated for  $\text{K}_{0.5}\text{Mn}_2\text{O}_4 \cdot 1.5\text{H}_2\text{O}$  (JCPDS Card 42-1317), Cryptomelane  $\text{KMn}_8\text{O}_{16}$  (34-0168) and  $\text{K}_6\text{Mn}_2\text{O}_6$  (ICDD PDF 01-070-1271).

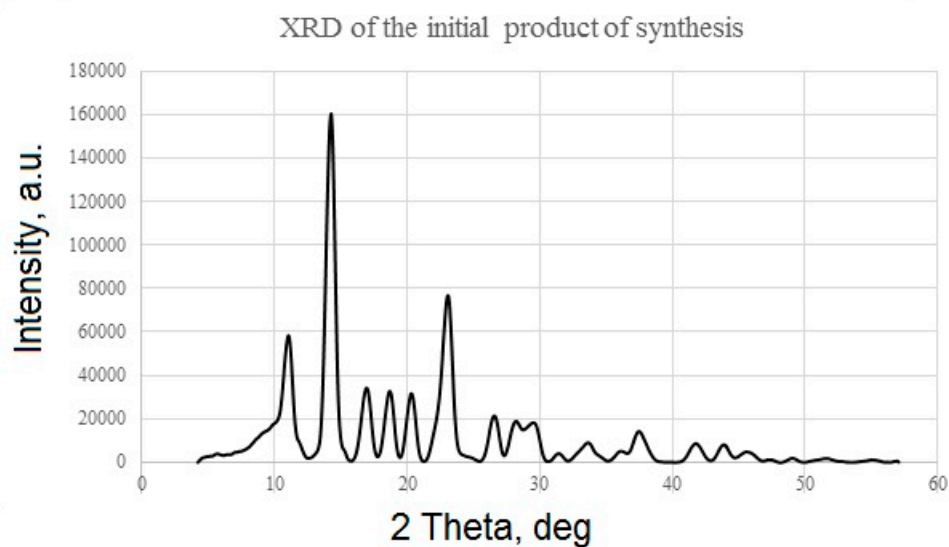

Figure S3. XRD of the initial product of solution synthesis featuring the pure  $\text{MnCO}_3$  phase ICPDS Card No. 86-0173.

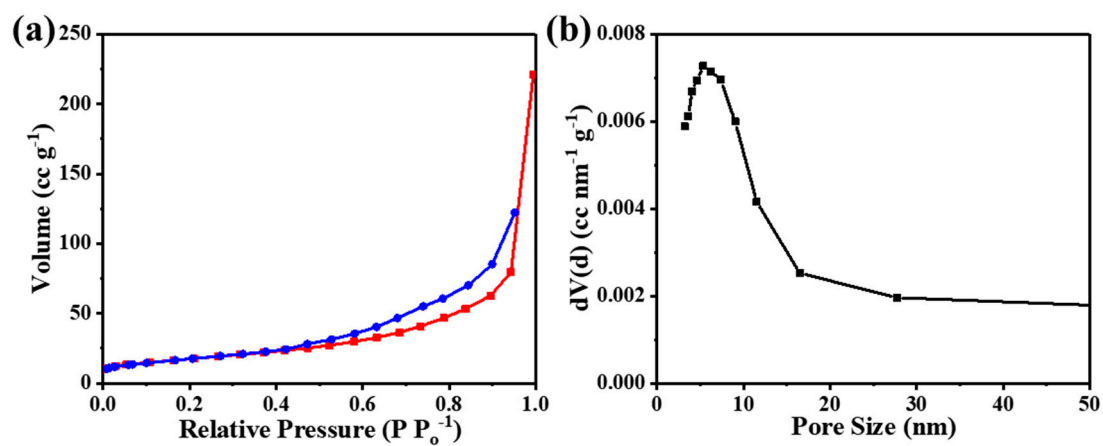

Figure S4. BET analysis of (a) N<sub>2</sub> absorption isotherm and (b) pore size distribution profile of prepared  $\alpha$ -MnO<sub>2</sub> nanomaterial.

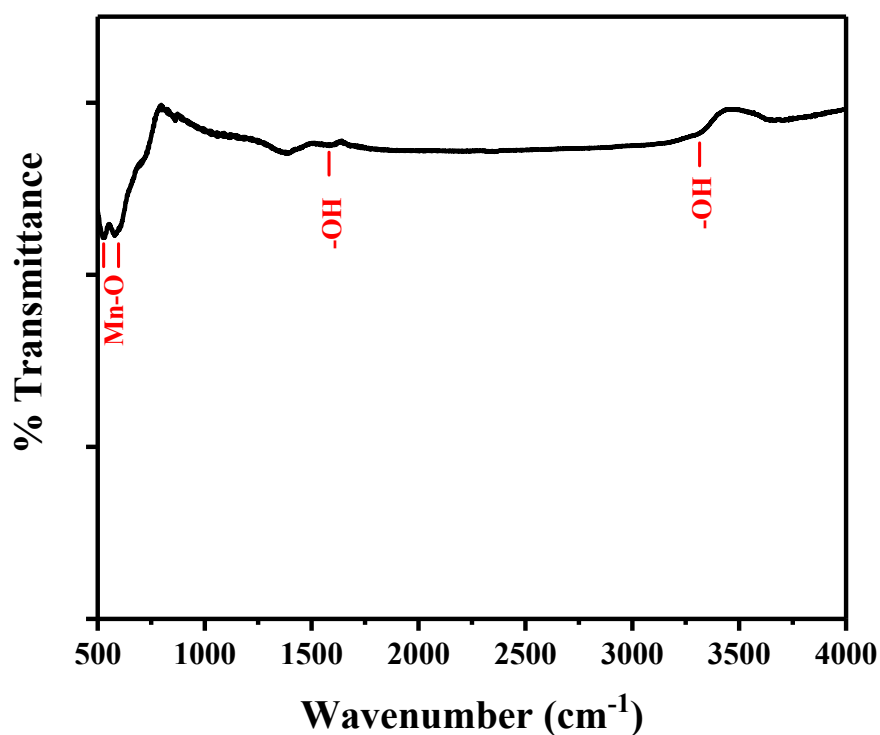

Figure S5. FTIR analysis for produced  $\alpha$ -MnO<sub>2</sub> nanomaterial.

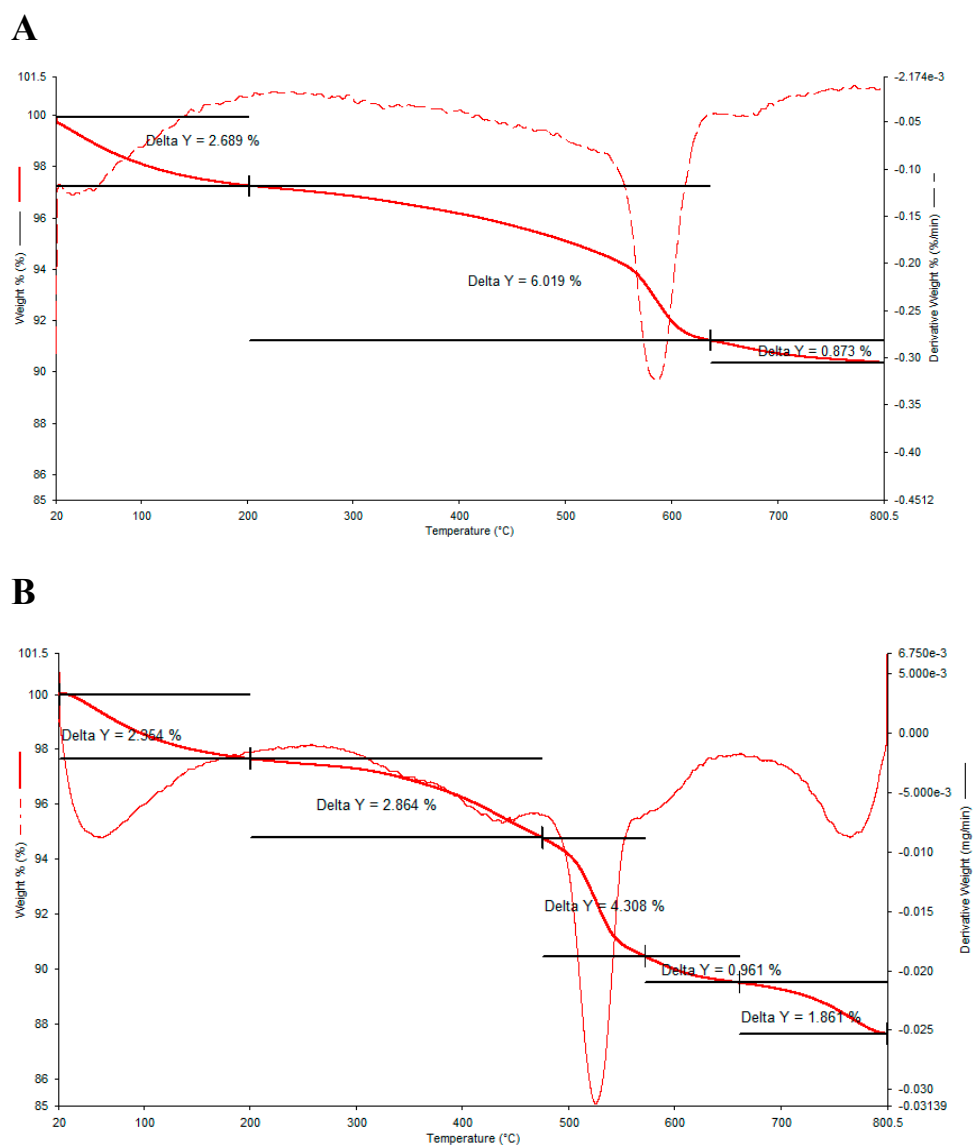

Figure S6. TGA (solid line) and DTG (dashed line) analysis of produced  $\alpha$ -MnO<sub>2</sub> nanomaterial in the air (A) and in the nitrogen (B) atmosphere.
